# Supplementary material for: Comparative studies on osteogenic potential of micro- and nanofibre scaffolds prepared by electrospinning of poly(ε-caprolactone)
Source: PubMed Central journal article supplement (PMC5151106; doi:10.1186/2194-0517-2-13), 2013-11-14

**A**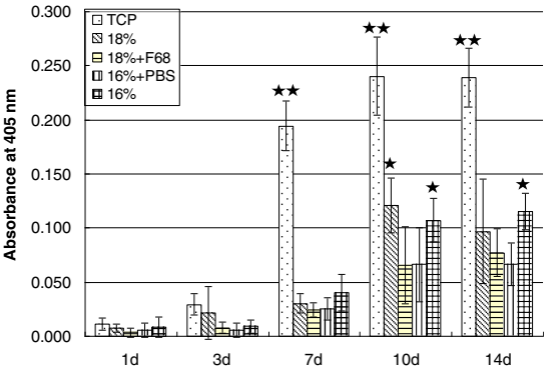**B**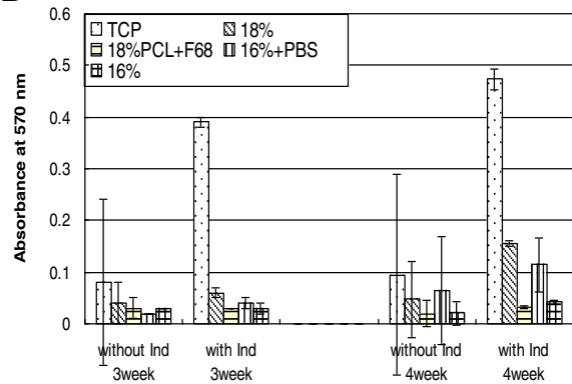

Supplement: 40204_2013_17_MOESM6_ESM.pdf [file 40204_2013_17_MOESM6_ESM.pdf]
